# Supplementary material for: Better through oxygen functionality? The benzophenone/dicyclohexylmethanol LOHC-system
Source: Royal Society of Chemistry journal article supplement (doi:10.1039/d2se01750d), 2023-01-01
Supplement: d2se01750d1.pdf [file d2se01750d1.pdf]

## Supporting Information

### Better Through Oxygen Functionality? The Benzophenone/Dicyclohexylmethanol LOHC-System

Dina Zakgeym,<sup>a,b</sup> Jonas David Hofmann,<sup>a</sup> Lukas Maurer,<sup>a</sup> Franziska Auer,<sup>a</sup> Karsten Müller,<sup>c</sup>  
Moritz Wolf,<sup>d</sup> Peter Wasserscheid<sup>a,b,\*</sup>

<sup>a</sup> Helmholtz-Institut Erlangen-Nürnberg für Erneuerbare Energien (IEK 11),  
Forschungszentrum Jülich GmbH, Erlangen, Germany

<sup>b</sup> Friedrich-Alexander-Universität Erlangen-Nürnberg (FAU), Lehrstuhl für Chemische  
Reaktionstechnik, Erlangen, Germany

<sup>c</sup> University of Rostock, Institute of Technical Thermodynamics, Rostock, Germany

<sup>d</sup> Karlsruhe Institute of Technology (KIT), Engler-Bunte-Institute & Institute of Catalysis  
Research and Technology, Karlsruhe, Germany

\*Corresponding author. Address: Cauerstr. 1, 91058 Erlangen, Germany. E-Mail-address:  
[p.wasserscheid@fz-juelich.de](mailto:p.wasserscheid@fz-juelich.de)

**Table SI-1:** Acquired mass spectra and retention times of the reaction intermediates and (side) products during dehydrogenation of H14-BP.

| Compound | Acquired mass spectrum                                                                                                                                                                                                                                                                                                                | Retention time [min] |
|----------|---------------------------------------------------------------------------------------------------------------------------------------------------------------------------------------------------------------------------------------------------------------------------------------------------------------------------------------|----------------------|
| H14-BP   | <p>Mass spectrum of H14-BP. The x-axis represents m/z from 60 to 200, and the y-axis represents Relative Abundance from 0 to 100. The base peak is at m/z 95.13. Other labeled peaks include 55.08, 57.08, 67.10, 68.12, 81.12, 93.11, 96.15, 98.15, 113.11, 114.13, 135.13, 149.15, 165.11, 178.18, and 194.16.</p>                  | 22.7-23.5            |
| H12-BP   | <p>Mass spectrum of H12-BP. The x-axis represents m/z from 60 to 200, and the y-axis represents Relative Abundance from 0 to 100. The base peak is at m/z 83.13. Other labeled peaks include 55.10, 56.12, 67.09, 68.12, 79.09, 84.15, 96.14, 110.10, 111.09, 112.11, 129.08, 139.19, 147.01, 163.14, 174.16, 192.16, and 194.18.</p> | 21.5-22.2            |
| H8-BP    | <p>Mass spectrum of H8-BP. The x-axis represents m/z from 60 to 200, and the y-axis represents Relative Abundance from 0 to 100. The base peak is at m/z 107.07. Other labeled peaks include 55.09, 63.10, 67.12, 77.06, 79.11, 81.10, 82.17, 91.07, 104.16, 105.06, 108.11, 121.16, 141.04, 155.23, 172.19, 190.21, and 191.30.</p>  | 28.0-28.1            |

H6-BP

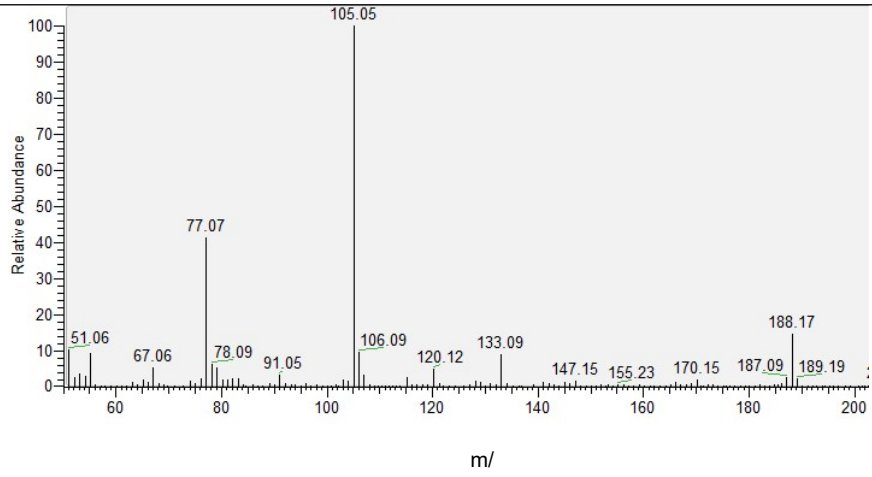

28.2-28.5

H12-DPM

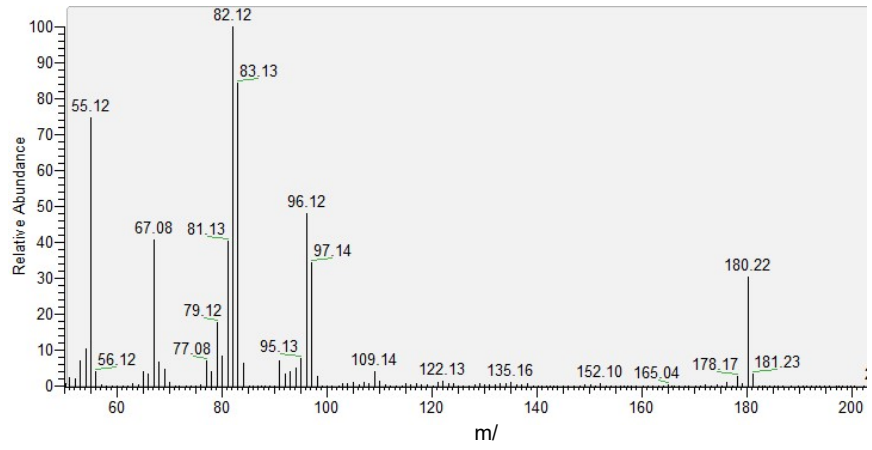

9.7-10.0

H6-DPM

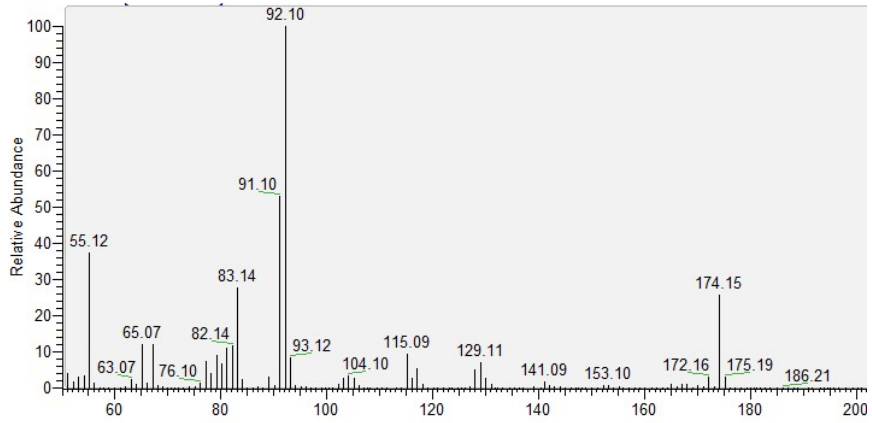

13.6-13.8

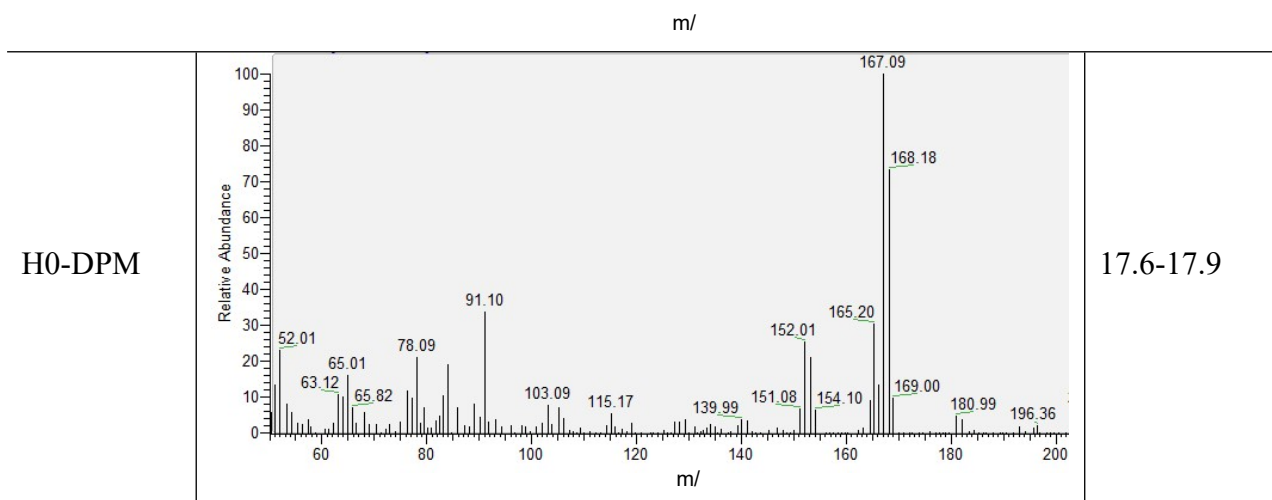

**Table SI-2:** GC spectra over the course of the dehydrogenation of H14-BP with a Pt/Al<sub>2</sub>O<sub>3</sub> catalyst.

| Reaction time [min] | GC spectrum |
|---------------------|-------------|
| 0                   |             |
| 30                  |             |

60

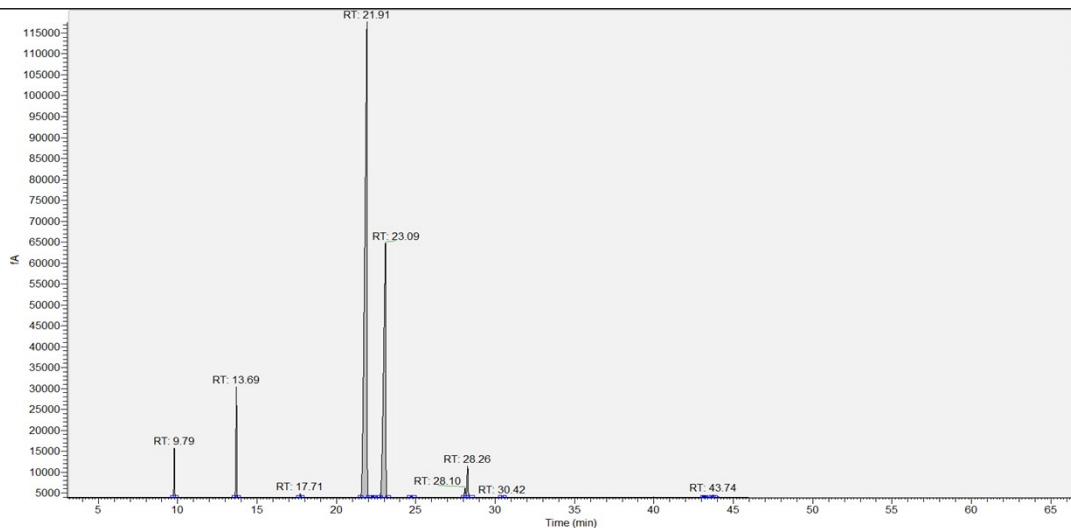

90

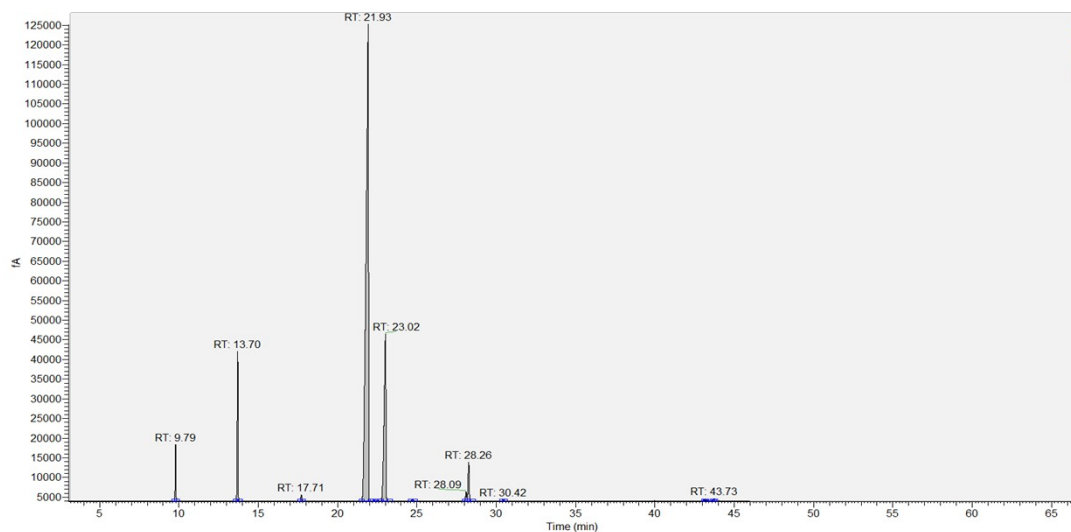

120

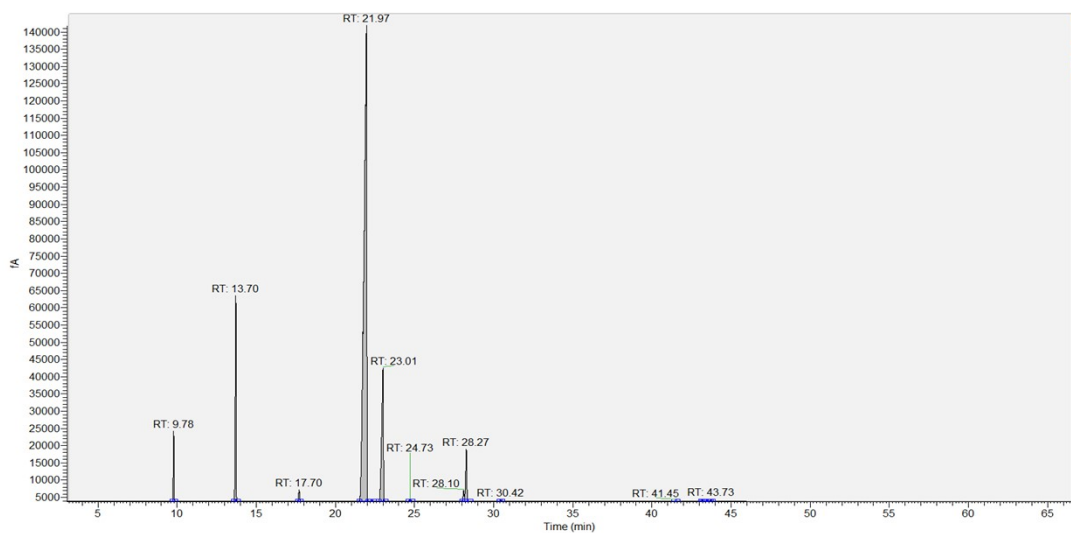

180

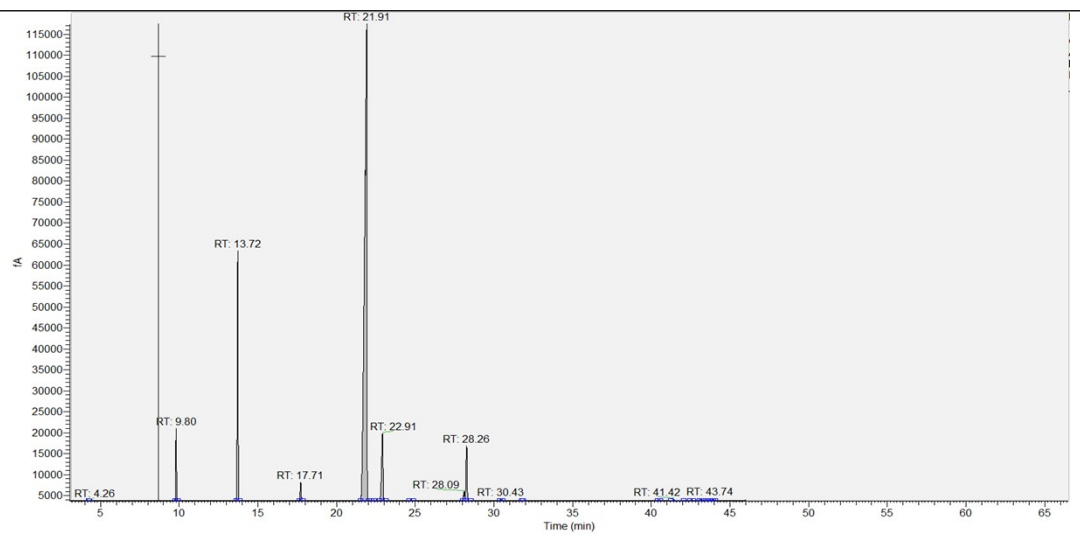

240

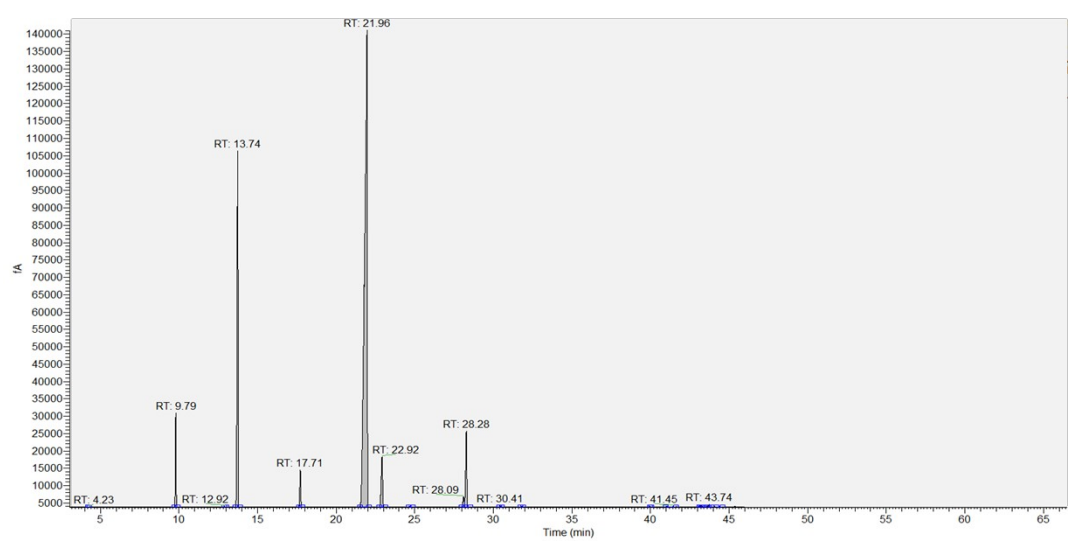

300

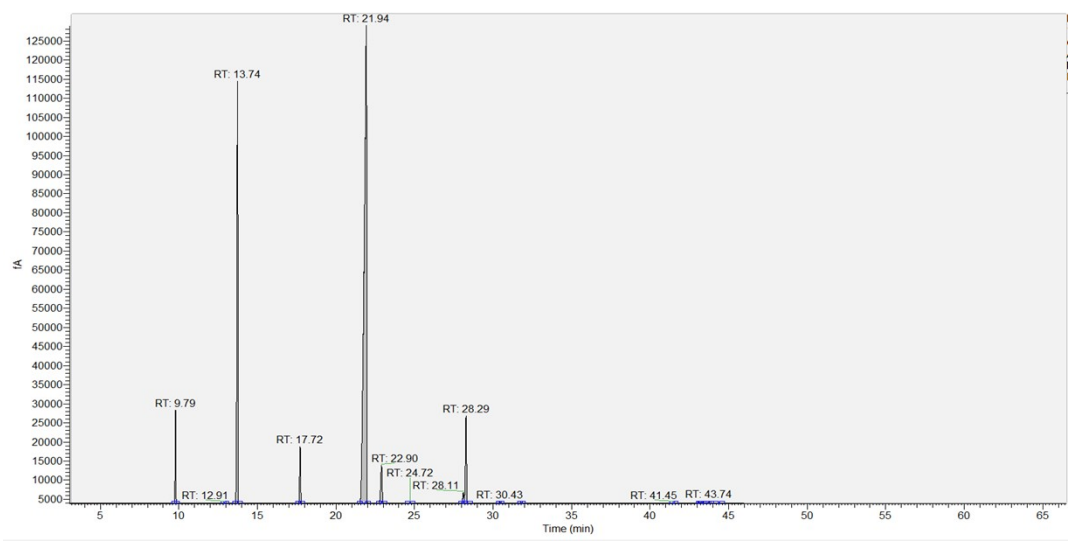

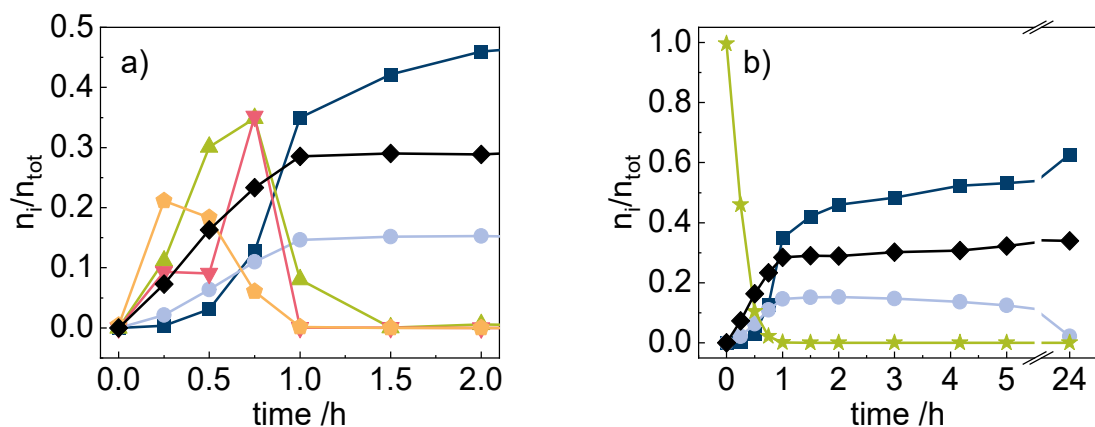

**Figure SI-1:** Liquid-phase molar reactant and product concentration in the hydrogenation of H0-BP with 5 mass% Ru/Al<sub>2</sub>O<sub>3</sub> at 180 °C and 50 bar H<sub>2</sub>, a) desired product H14-BP (■) and intermediate species H2-BP (◆), H6-BP (▼), H8-BP (▲), H12-BP (●) as well as the sum of all Hx-DPM side products (◆) in the first 2 h of reaction time, b) reactant H0-BP (★) and main products H14-BP (■) and H12-BP (●) as well as the sum of all Hx-DPM side products (◆) over the course of 24 h reaction time.

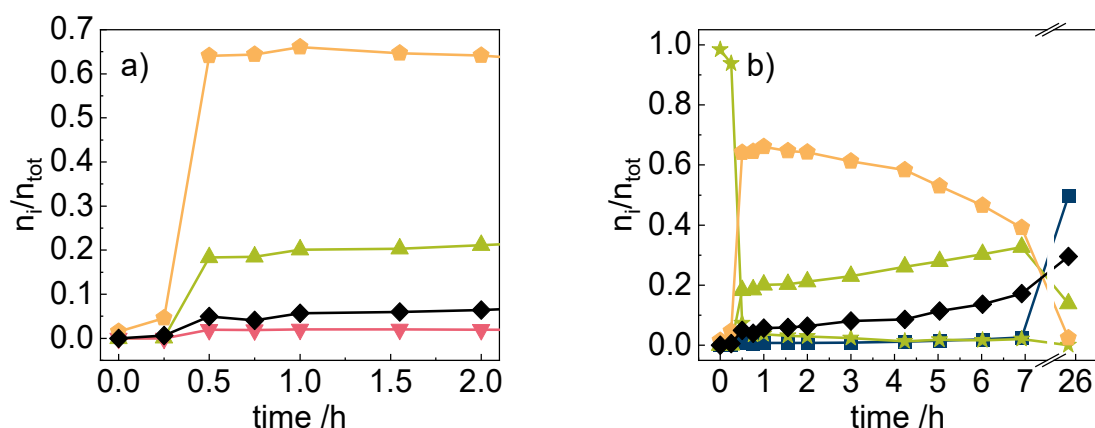

**Figure SI-2:** Liquid-phase molar reactant and product concentration in the hydrogenation of H0-BP with 0.3 mass% Pt/Al<sub>2</sub>O<sub>3</sub> at 180 °C and 50 bar H<sub>2</sub>, a) intermediate species H2-BP (◆), H6-BP (▼) and H8-BP (▲) as well as the sum of all Hx-DPM side products (◆) in the first 2 h of reaction time, b) reactant H0-BP (★) and main products H14-BP (■), H2-BP (◆) and H8-BP (▲), as well as the sum of all Hx-DPM side products (◆) over the course of 26 h reaction time.

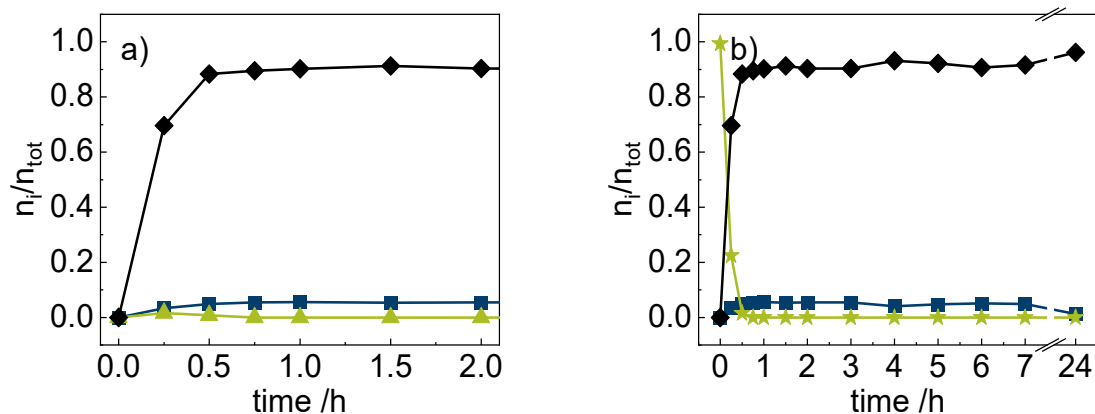

**Figure SI-3:** Liquid-phase molar reactant and product concentration in the hydrogenation of H0-BP with 5 mass% Pt/C at 180 °C and 50 bar H<sub>2</sub>, a) desired product H14-BP (■) and intermediate species H8-BP (▲) as well as the sum of all Hx-DPM side products (◆) in the first 2 h of reaction time, b) reactant H0-BP (★) and product H14-BP (■) as well as the sum of all Hx-DPM side products (◆) over the course of 24 h reaction time.

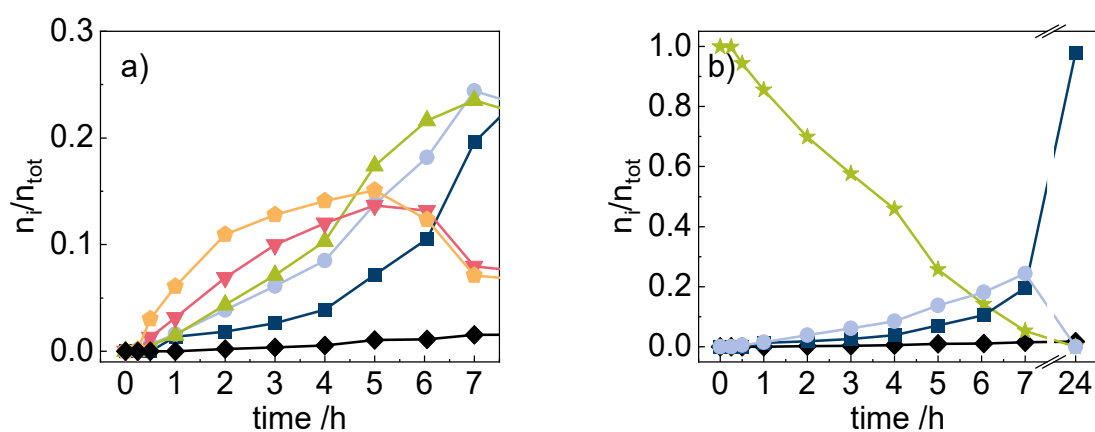

**Figure SI-4:** Liquid-phase molar reactant and product concentration in the hydrogenation of H0-BP with 5 mass% Ru/Al<sub>2</sub>O<sub>3</sub> at 90 °C and 50 bar H<sub>2</sub>, a) desired product H14-BP (■) and intermediate species H2-BP (◆), H6-BP (▼), H8-BP (▲), H12-BP (●) as well as the sum of all Hx-DPM side products (◆) in the first 7 h of reaction time, b) reactant H0-BP (★) and main products H14-BP (■) and H12-BP (●) as well as the sum of all Hx-DPM side products (◆) over the course of 24 h reaction time.



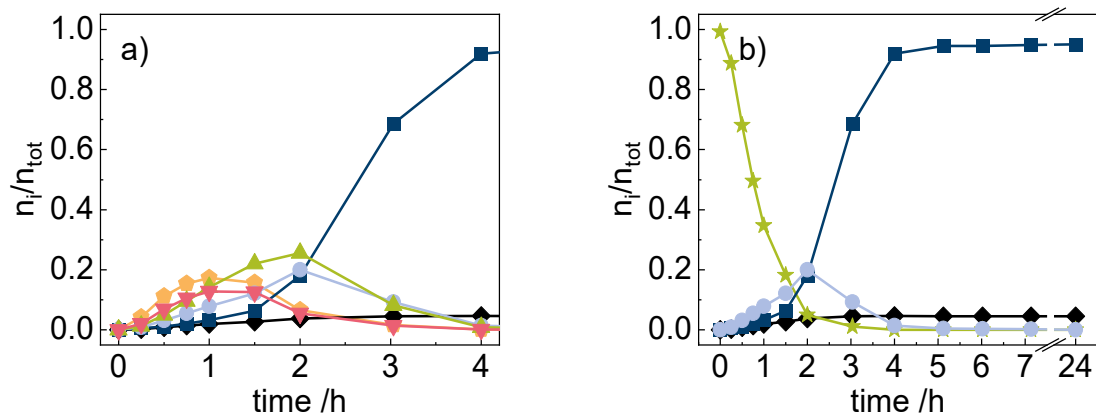

**Figure SI-5:** Liquid-phase molar reactant and product concentration in the hydrogenation of H0-BP with 5 mass% Ru/Al<sub>2</sub>O<sub>3</sub> at 120 °C and 50 bar H<sub>2</sub>, a) desired product H14-BP (■) and intermediate species H2-BP (◆), H6-BP (▼), H8-BP (▲), H12-BP (●) as well as the sum of all Hx-DPM side products (◆) in the first 4 h of reaction time, b) reactant H0-BP (★) and main products H14-BP (■) and H12-BP (●) as well as the sum of all Hx-DPM side products (◆) over the course of 24 h reaction time.

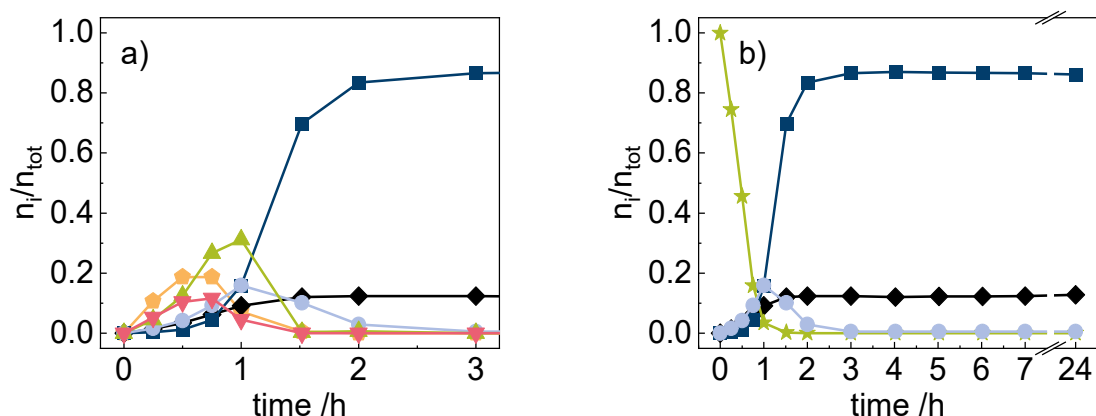

**Figure SI-6:** Liquid-phase molar reactant and product concentration in the hydrogenation of H0-BP with 5 mass% Ru/Al<sub>2</sub>O<sub>3</sub> at 150 °C and 50 bar H<sub>2</sub>, a) desired product H14-BP (■) and intermediate species H2-BP (◆), H6-BP (▼), H8-BP (▲), H12-BP (●) as well as the sum of all Hx-DPM side products (◆) in the first 3 h of reaction time, b) reactant H0-BP (★) and main products H14-BP (■) and H12-BP (●) as well as the sum of all Hx-DPM side products (◆) over the course of 24 h reaction time.

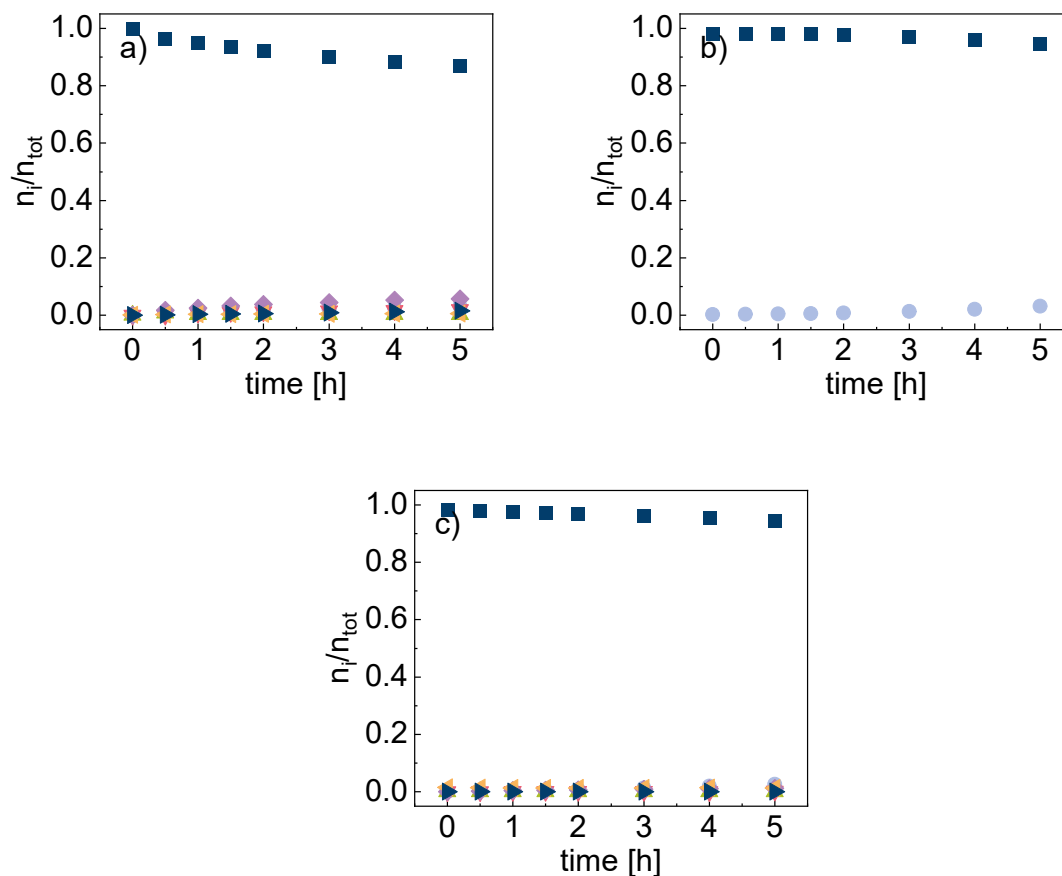

**Figure SI-7:** Liquid phase molar concentration of reactant and products in the dehydrogenation of 0.15 mol H14-BP at 230 °C with 200 mL min<sup>-1</sup> argon overflow over a) Pd/C, 5 mass%, b) Ir/C, 5 mass%, or c) Rh/C, 5 mass%: H14-BP (■), H12-BP (●), H8-BP (▲), H6-BP (▼), H12-DPM (◀), H6-DPM (◆), H0-DPM (▶). Pd/C: Sigma Aldrich, 75992; Ir/C: Fuelcellstore, 6091601; Rh/C: Alfa Aesar, A15965.

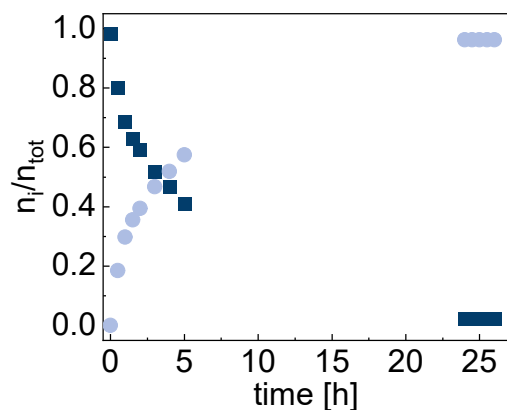

**Figure SI-8:** Liquid phase molar concentrations of reactant H14-BP (■) and only product H12-BP (●) in the dehydrogenation of 0.15 mol H14-BP at 170 °C with 200 mL min<sup>-1</sup> argon overflow over CuO/ZnO/Al<sub>2</sub>O<sub>3</sub>.

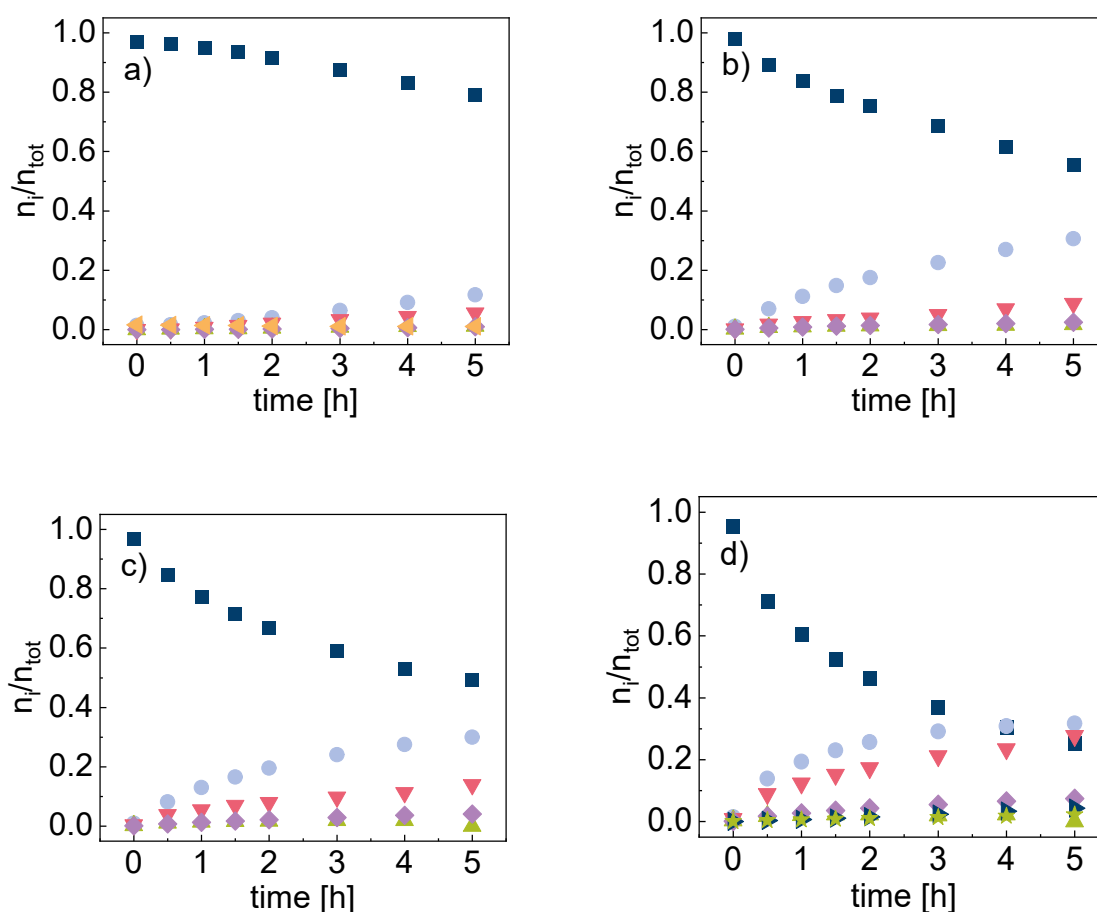

**Figure SI-9:** Liquid phase molar concentration of reactant and products in the dehydrogenation of 0.15 mol H14-BP at a) 220 °C, b) 230 °C, c) 240 °C, and d) 250 °C, with 200 mL min<sup>-1</sup> argon overflow over Pt/C, 5 mass%: H14-BP (■), H12-BP (●), H8-BP (▲), H6-BP (▼), H0-BP (★), H6-DPM (◆), H0-DPM (▶).
